# Supplementary material for: Occupancy Models with Autocorrelated Detection Heterogeneity
Source: Research Square preprint supplement (doi:10.21203/rs.3.rs-2489236/v1), 2023-01-19
Supplement: Supplementary file 1 [file c7e3982dd7469fd67d8849cb.pdf]

# Occupancy Models with Autocorrelated Detection Heterogeneity – Supplementary Material

Staci Hepler<sup>1\*</sup> and Biqing Yang<sup>2</sup>

<sup>1\*</sup>Department of Statistical Sciences, Wake Forest University,  
Winston-Salem, North Carolina, USA.

<sup>2</sup>Department of Statistics, The Ohio State University, Columbus,  
Ohio, USA.

\*Corresponding author(s). E-mail(s): [heplersa@wfu.edu](mailto:heplersa@wfu.edu);

## 1 Simulation Study Supplemental Information

### 1.1 Additional Simulation Details

We simulated data for  $S = 2$  species at  $n = 100$  locations on an equispaced  $10 \times 10$  grid over  $[0, 1] \times [0, 1]$  for  $T = 5, 10, 20$  seasons with  $J = 1, 3, 5$  surveys per season. Let  $x$  and  $y$  denote the coordinates of the grid centroids. We generated a spatio-temporal variable  $v_1$  using a  $n$ -dimensional random walk with a spatial exponential covariance function with variance of 0.1 and scale parameter of 0.8. A temporal variable  $v_2$  was generated such that for time  $t$ , it took the value  $\sin(2\pi t/T)$ . The occupancy design matrix,  $\mathbf{X}$ , used to simulate and fit the data for both species had columns for  $x$ ,  $y$ ,  $v_1$ , and  $v_2$ . The occupancy random effect was generated assuming  $q = 100$  Moran's I basis functions and MCAR precision matrix  $\Sigma^{-1} \otimes (\mathbf{D} - 0.9\mathbf{A})$ . The true occupancy probabilities were simulated using true values of the regression coefficients of  $\boldsymbol{\alpha}^{(1)} = (-0.75, 0.5, 0.25, -0.8, 0.75)$  and  $\boldsymbol{\alpha}^{(1)} = (-0.5, 0.25, -0.25, -0.75, 0.5)$ .

We also generated covariates to be used for detectability. Let  $w_1$  be a spatio-temporal random variable generated using a multivariate random walk with squared exponential covariance function using variance 0.2 and scale parameter of  $\sqrt{1.4}$ . A temporal variable  $w_2$  was generated by taking the log of the enumerated values for the season. So the detection design matrix had columns

## 2 Supplementary Material

for the  $x$ -coordinate,  $w_1$ , and  $w_2$ . Note that in the multi-survey per season setting, the detection covariates were assumed to be the same for every survey within the season. The true values for the detection regression coefficients were  $\beta^{(1)} = (-0.1, -0.5, 0.8, -0.1)$  and  $\beta^{(2)} = (0, -0.25, 0.5, 0.1)$ .

### 1.2 Simulation Additional Results

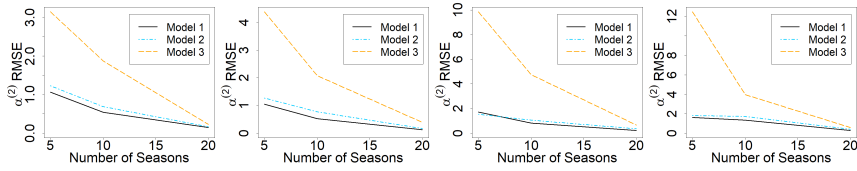

**Fig. 1:** Root mean squared errors of the occupancy regression coefficients for species 2 under all three models and number of seasons.

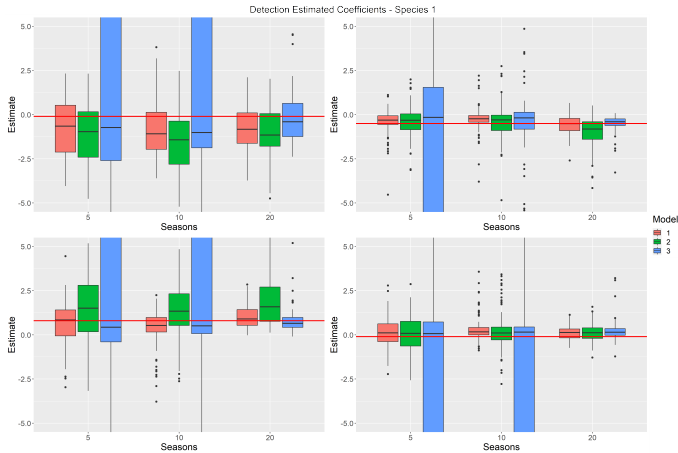

**Fig. 2:**  $H = 100$  posterior means of each species 1 detection regression coefficient for each model and number of seasons when  $J = 1$ . We note that boxplots for model 3 extend past the limit of the y-axis, but this view makes it easier to assess models 1 and 2.

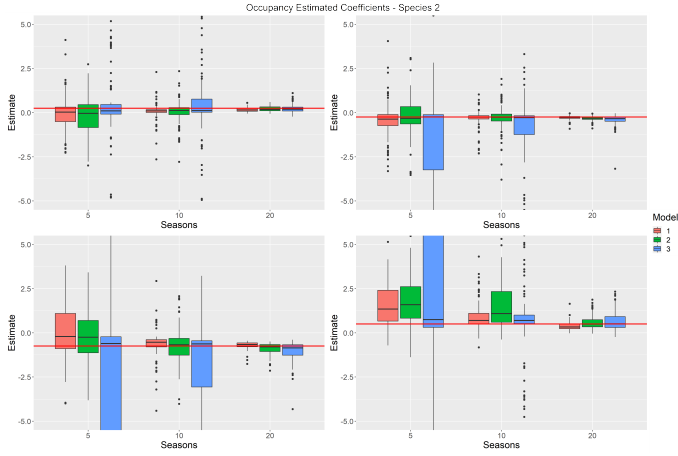

**Fig. 3:**  $H = 100$  posterior means of each species 2 occupancy regression coefficient for each model and number of seasons when  $J = 1$ .

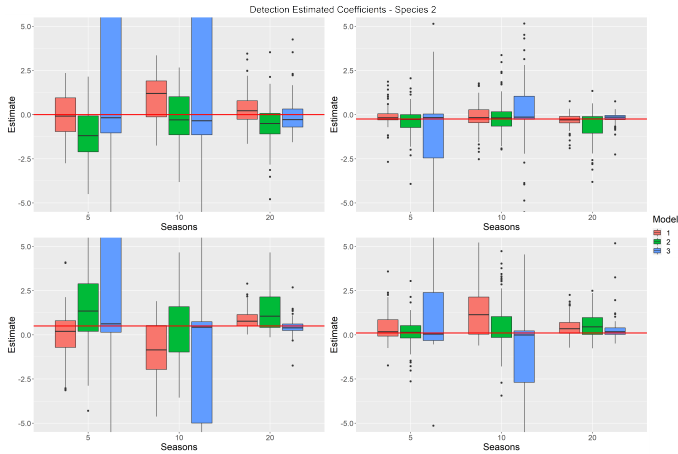

**Fig. 4:**  $H = 100$  posterior means of each species 2 detection regression coefficient for each model and number of seasons when  $J = 1$ .

4 *Supplementary Material*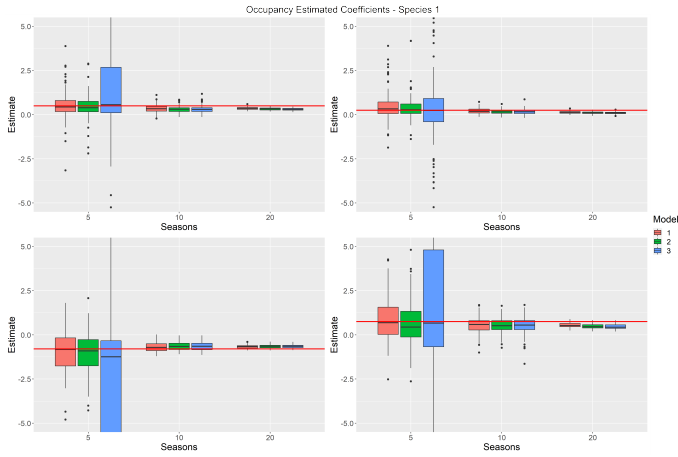

**Fig. 5:**  $H = 100$  posterior means of each species 2 occupancy regression coefficient for each model and number of seasons when  $J = 3$  surveys are taken per season.

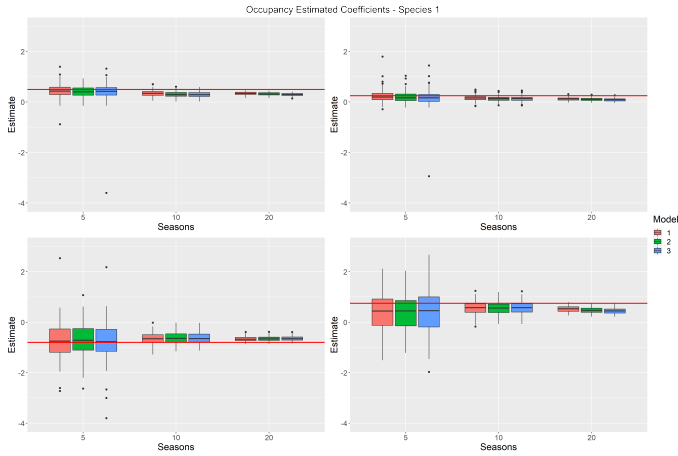

**Fig. 6:**  $H = 100$  posterior means of each species 2 occupancy regression coefficient for each model and number of seasons when  $J = 5$  surveys are taken per season.

## 2 Application Supplemental Results

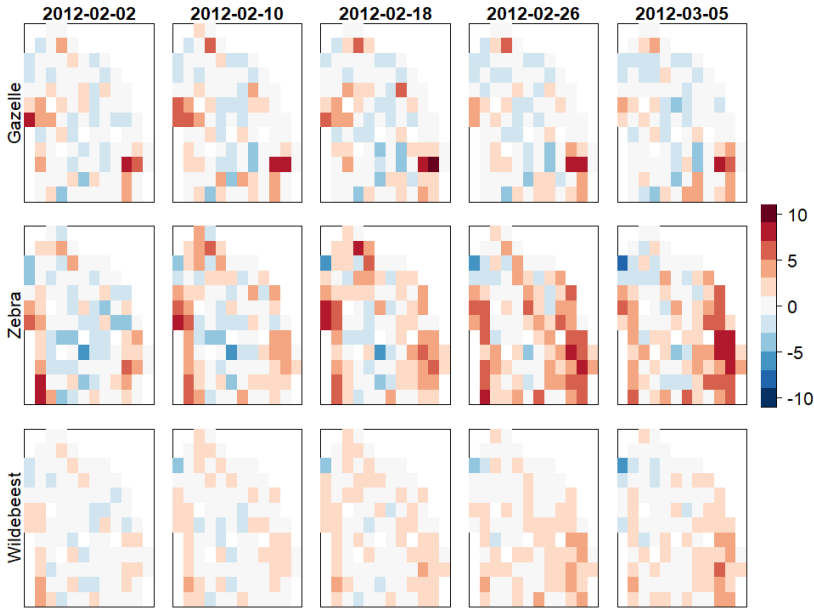

**Fig. 7:** Estimated values of the multivariate temporal random effect,  $\omega_{it}^{(s)}$  for five consecutive seasons for each species.

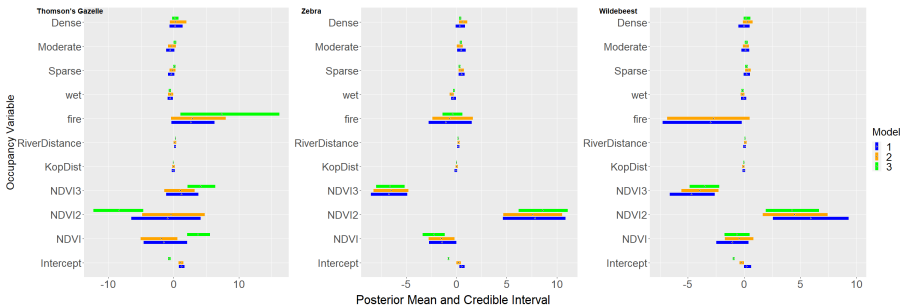

**Fig. 8:** Occupancy regression coefficient credible intervals for each species under each of the three models. Note that the coefficient for fire for wildebeest was less than -5 so it doesn't appear on the chart with the given x-limits

6 *Supplementary Material*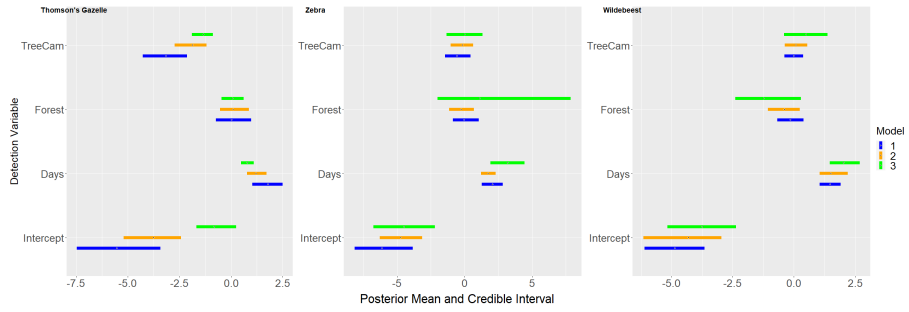

**Fig. 9:** Detection regression coefficient credible intervals for each species under each of the three models.

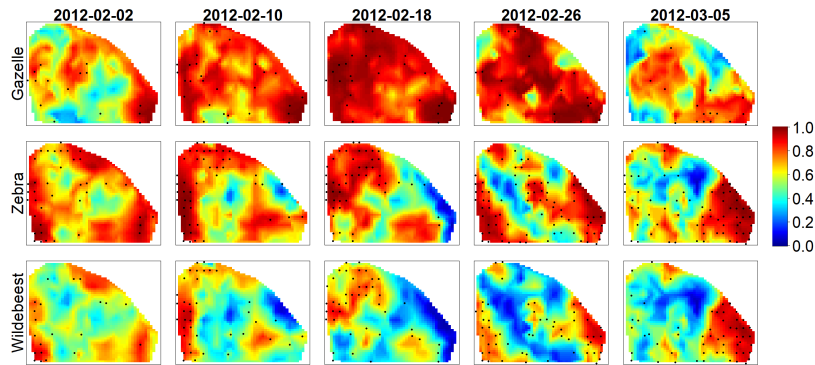

**Fig. 10:** Estimated occupancy probabilities for five consecutive seasons under model  $\mathcal{M}_2$  that has a detection temporal random effect that is independent across species and has a spatially homogeneous temporal autocorrelation parameter in detection.

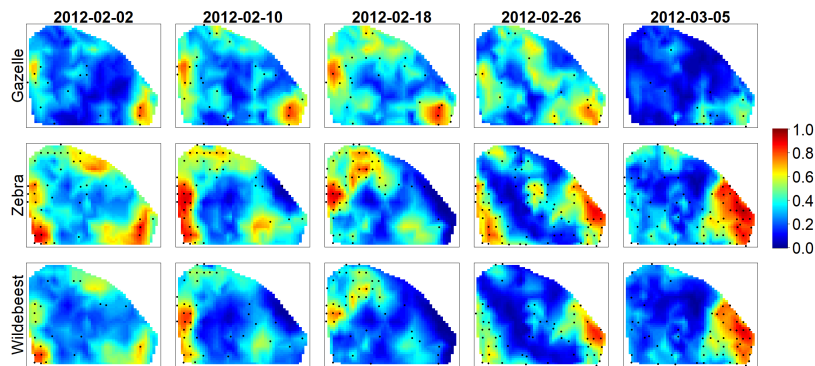

**Fig. 11:** Estimated occupancy probabilities for five consecutive seasons under model  $\mathcal{M}_3$  that only has covariates in detection.

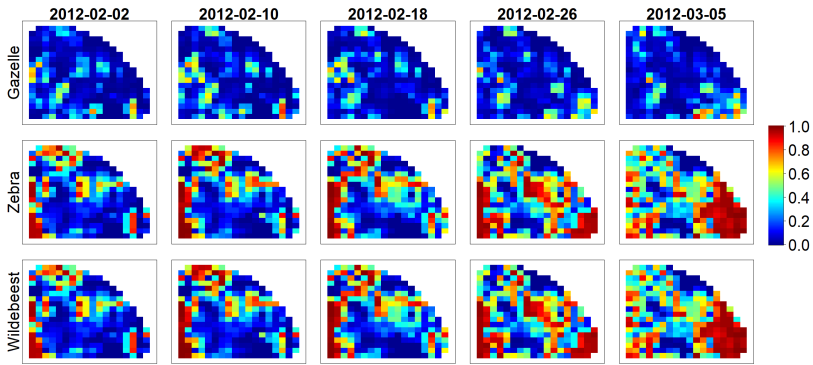

**Fig. 12:** Estimated detection probabilities for five consecutive seasons under model  $\mathcal{M}_2$ .

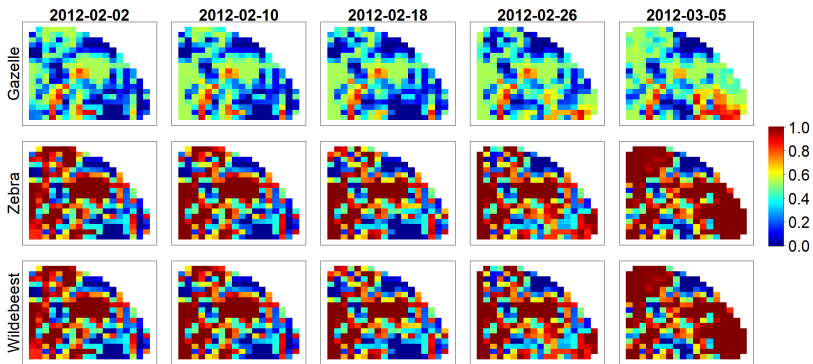

**Fig. 13:** Estimated detection probabilities for five consecutive seasons under model  $\mathcal{M}_3$ .

### 3 Full Conditional Distributions

The posterior distribution can be explored with a Gibbs sampling algorithm since the full conditionals for each unknown quantity are known. These full conditionals are given below, where the notation  $[V \mid \cdot]$  is used to denote the distribution of a random variable  $V$  conditional on all other random variables and on the data. Note that the derivations have been modified accordingly from Hepler and Erhardt (2021).

- For sites  $i = 1, \dots, n$ , time  $t = 1, \dots, T$ , and species  $s = 1, \dots, S$ , if  $\sum_{j=1}^J Y_{itj}^{(s)} > 0$  then  $Z_{it}^{(s)} = 1$  with probability 1. If  $\sum_{j=1}^J Y_{itj}^{(s)} = 0$ , then

$$[Z_{it}^{(s)} \mid \boldsymbol{\alpha}^{(s)}, \boldsymbol{\gamma}_t^{(s)}, \boldsymbol{\beta}^{(s)}, \omega_{it}^{(s)}] = \text{Bernoulli}(\bar{\Phi}),$$

where

$$\bar{\Phi} = \frac{\Phi(\mathbf{X}_{it}^{(s)} \boldsymbol{\alpha}^{(s)} + \mathbf{K}_{it}^{(s)} \boldsymbol{\gamma}_t^{(s)}) \prod_{j=1}^J (1 - \Phi(\mathbf{W}_{itj} \boldsymbol{\beta}^{(s)} + \omega_{it}^{(s)}))}{\Phi(\mathbf{X}_{it}^{(s)} \boldsymbol{\alpha}^{(s)} + \mathbf{K}_{it}^{(s)} \boldsymbol{\gamma}_t^{(s)}) \prod_{j=1}^J (1 - \Phi(\mathbf{W}_{itj} \boldsymbol{\beta}^{(s)} + \omega_{it}^{(s)})) + 1 - \Phi(\mathbf{X}_{it}^{(s)} \boldsymbol{\alpha}^{(s)} + \mathbf{K}_{it}^{(s)} \boldsymbol{\gamma}_t^{(s)})}$$

In the above,  $\mathbf{K}_{it}^{(s)}$  is the  $i$ th row of the matrix of basis functions  $\mathbf{K}_t^{(s)}$ .

- For sites  $i = 1, \dots, n$ , time  $t = 1, \dots, T$ , and species  $s = 1, \dots, S$ , the latent occupancy process has full conditional distributions

$$[\tilde{Z}_{it}^{(s)} \mid \cdot] = \begin{cases} TN_{(-\infty, 0)}(\mathbf{X}_{it}^{(s)} \boldsymbol{\alpha}^{(s)} + \mathbf{K}_{it}^{(s)} \boldsymbol{\gamma}_t^{(s)}, 1) & \text{if } Z_{it}^{(s)} = 0 \\ TN_{(0, \infty)}(\mathbf{X}_{it}^{(s)} \boldsymbol{\alpha}^{(s)} + \mathbf{K}_{it}^{(s)} \boldsymbol{\gamma}_t^{(s)}, 1) & \text{if } Z_{it}^{(s)} = 1, \end{cases}$$

where  $TN_{(a,b)}$  denotes the truncated normal distribution, truncated to  $(a, b)$ .

- Provided  $T > 2$ , for each  $t = 1, \dots, T$ , we update the  $Sq$ -dimensional vector  $\boldsymbol{\gamma}_t$  jointly.
  - For  $t = 1$ , the full conditional is  $[\boldsymbol{\gamma}_1 \mid \cdot] = N(\bar{\boldsymbol{\mu}}, \bar{\boldsymbol{\Sigma}})$ , where

$$\bar{\boldsymbol{\Sigma}}^{-1} = \mathbf{I}_{Sq} + \mathbf{K}_1^{*'} \mathbf{Q} \mathbf{K}_1^* + \mathbf{M}' \mathbf{K}_2^{*'} \mathbf{Q} \mathbf{K}_2^* \mathbf{M}$$

$$\bar{\boldsymbol{\mu}} = \bar{\boldsymbol{\Sigma}} \times \left\{ \mathbf{K}_1^{*'} (\tilde{\mathbf{Z}}_1 - \mathbf{X}_1^* \boldsymbol{\alpha}) + \mathbf{M}' (\mathbf{K}_2^{*'} \mathbf{Q} \mathbf{K}_2^*) \boldsymbol{\gamma}_2 \right\}$$

- For  $t = 2, \dots, T-1$ , the full conditional is  $[\boldsymbol{\gamma}_t \mid \cdot] = N(\bar{\boldsymbol{\mu}}, \bar{\boldsymbol{\Sigma}})$ , where

$$\bar{\boldsymbol{\Sigma}}^{-1} = \mathbf{I}_{Sq} + \mathbf{K}_t^{*'} \mathbf{Q} \mathbf{K}_t^* + \mathbf{M}' \mathbf{K}_{t+1}^{*'} \mathbf{Q} \mathbf{K}_{t+1}^* \mathbf{M}$$

$$\bar{\boldsymbol{\mu}} = \bar{\boldsymbol{\Sigma}} \times \left\{ \mathbf{K}_t^{*'} (\tilde{\mathbf{Z}}_t - \mathbf{X}_t^* \boldsymbol{\alpha}) + \mathbf{M}' (\mathbf{K}_{t+1}^{*'} \mathbf{Q} \mathbf{K}_{t+1}^*) \boldsymbol{\gamma}_{t+1} + (\mathbf{K}_t^{*'} \mathbf{Q} \mathbf{K}_t^*) \mathbf{M} \boldsymbol{\gamma}_{t-1} \right\}$$

- For  $t = T$ , the full conditional is  $[\boldsymbol{\gamma}_T \mid \cdot] = N(\bar{\boldsymbol{\mu}}, \bar{\boldsymbol{\Sigma}})$ , where

$$\bar{\boldsymbol{\Sigma}}^{-1} = \mathbf{I}_{Sq} + \mathbf{K}_T^{*'} \mathbf{Q} \mathbf{K}_T^*$$

$$\bar{\boldsymbol{\mu}} = \bar{\boldsymbol{\Sigma}} \times \left\{ \mathbf{K}_T^{*'} (\tilde{\mathbf{Z}}_T - \mathbf{X}_T^* \boldsymbol{\alpha}) + (\mathbf{K}_T^{*'} \mathbf{Q} \mathbf{K}_T^*) \mathbf{M} \boldsymbol{\gamma}_{T-1} \right\}$$

Note that since the prior on  $\gamma_t$  is intrinsic MCAR, a centering constraint  $1/q \sum_{i=1}^q \gamma_{it}^{(s)} = 0$  must be enforced for all  $s, t$  to ensure the posterior is proper and to be able to identify an intercept parameter.

- For each  $s = 1, \dots, S$ , we update the vector of occupancy fixed effects for species  $s$  jointly. Observe that

$$\tilde{\mathbf{Z}}^{(s)} = \mathbf{X}^{(s)} \boldsymbol{\alpha}^{(s)} + \mathbf{K}^{(s)} \boldsymbol{\gamma}^{(s)} + \boldsymbol{\epsilon}^{(s)},$$

where  $\mathbf{X}^{(s)}$  denotes the full design matrix for species  $s$ , that is,  $\mathbf{X}^{(s)} = (\mathbf{X}_1^{(s)'}, \dots, \mathbf{X}_T^{(s)'})'$  so that the design matrices for each time period are row-concatenated,  $\mathbf{K}^{(s)} = \text{diag}(\mathbf{K}_t^{(s)})$  is the block diagonal matrix of basis functions for each time period, and  $\boldsymbol{\gamma}^{(s)} = (\gamma_1^{(s)'}, \dots, \gamma_T^{(s)'})'$  is the vector of spatial random effects for each time period. The full conditional is  $[\boldsymbol{\alpha}^{(s)} \mid \cdot] = N(\bar{\boldsymbol{\mu}}, \bar{\boldsymbol{\Sigma}})$ , where depending on the choice of prior distribution,

$$\bar{\boldsymbol{\Sigma}}^{-1} = \begin{cases} \begin{pmatrix} \mathbf{X}^{(s)'} \mathbf{X}^{(s)} \end{pmatrix} & \text{if } \pi(\boldsymbol{\alpha}^{(s)}) = 1 \\ \begin{pmatrix} \mathbf{X}^{(s)'} \mathbf{X}^{(s)} + \tau_a \mathbf{I} \end{pmatrix} & \text{if } \boldsymbol{\alpha}^{(s)} \sim N(0, \tau_a), \end{cases}$$

for precision  $\tau_a$ . Then,

$$\bar{\boldsymbol{\mu}} = \bar{\boldsymbol{\Sigma}} \times \left\{ \mathbf{X}^{(s)'} \left( \tilde{\mathbf{Z}}^{(s)} - \mathbf{K}^{(s)} \boldsymbol{\gamma}^{(s)} \right) \right\}.$$

- Our model assumes the occupancy propagator matrix is of the form  $\mathbf{M} = \text{diag}(\rho_1, \dots, \rho_S) \otimes \mathbf{I}_q$ . Let  $\boldsymbol{\rho} \equiv (\rho_1, \dots, \rho_S)'$ . We update the vector  $\boldsymbol{\rho}$  with a single Gibbs update. Let  $D(\gamma_{t-1})$  be the  $qS \times S$  block diagonal matrix with  $q \times 1$ -dimensional blocks  $\gamma_{t-1}^{(s)}$  for  $s = 1, \dots, S$ . Under this specification, the full conditional distribution of  $\boldsymbol{\rho}$  is multivariate normal (or truncated multivariate normal if the prior on  $\boldsymbol{\rho}$  is chosen to have support smaller than the whole real line). That is,  $[\boldsymbol{\rho} \mid \cdot] = N(\bar{\boldsymbol{\mu}}, \bar{\boldsymbol{\Sigma}})$ , where

$$\bar{\boldsymbol{\Sigma}}^{-1} = \sum_{t=2}^T D(\gamma_{t-1})' \mathbf{K}_t^{*'} \mathbf{Q} \mathbf{K}_t^* D(\gamma_{t-1})$$

$$\bar{\boldsymbol{\mu}} = \bar{\boldsymbol{\Sigma}} \times \left( \sum_{t=2}^T D(\gamma_{t-1})' \mathbf{K}_t^{*'} \mathbf{Q} \mathbf{K}_t^* \gamma_t \right)$$

- A Gibbs update can be performed for  $\Sigma$  assuming  $\mathbf{X}_t^{(s)} = \mathbf{X}_t$  for all  $s = 1, \dots, S$ , which implies  $\mathbf{K}_t^{(s)} = \mathbf{K}_t$  for all  $s = 1, \dots, S$  and  $t = 1, \dots, T$ , and thus  $\mathbf{X}_t^* = \mathbf{I}_S \otimes \mathbf{X}_t$  and  $\mathbf{K}_t^{*'} \mathbf{Q} \mathbf{K}_t^* = \Sigma^{-1} \otimes \mathbf{K}_t' (\mathbf{D} - \mathbf{A}) \mathbf{K}_t$ . Assuming an inverse Wishart prior distribution for  $\Sigma$  with parameters  $\nu$  and  $\Psi$ , the full conditional distribution of  $\Sigma$  is inverse Wishart with parameters  $\nu + qT$  and  $\Psi + \sum_{t=1}^T \mathbf{B}_t$ , where  $\mathbf{B}_t$  is the  $S \times S$  matrix with  $(i, j)$ th entry  $(B_t)_{i,j} =$

trace  $\left( \mathbf{C}_{i,j}^{(t)} \mathbf{K}_t' (\mathbf{D} - \mathbf{A}) \mathbf{K}_t \right)$ , where for  $t = 1$ ,  $\mathbf{C}^{(1)}$  is the block matrix with  $(i, j)$ th block

$$\mathbf{C}_{i,j}^{(1)} = (\gamma_1^{(i)})(\gamma_1^{(j)})'$$

for  $i, j = 1, \dots, S$ , and for  $t = 2, \dots, T$  we have the block matrix with  $(i, j)$ th block

$$\mathbf{C}_{i,j}^{(t)} = (\gamma_t^{(i)} - \rho_i \gamma_{t-1}^{(i)})(\gamma_t^{(j)} - \rho_j \gamma_{t-1}^{(j)})'.$$

- For each site, time, species, and survey  $j = 1, \dots, J$ , the full conditional distributions for the latent continuous detection process are

$$[\tilde{Y}_{itj}^{(s)} \mid \cdot] = \begin{cases} TN_{(-\infty, 0)} \left( \mathbf{W}_{it} \boldsymbol{\beta}^{(s)} + \omega_{it}^{(s)}, 1 \right) & \text{if } Y_{itk}^{(s)} = 0 \text{ and } Z_{it}^{(s)} = 1 \\ TN_{(0, \infty)} \left( \mathbf{W}_{it} \boldsymbol{\beta}^{(s)} + \omega_{it}^{(s)}, 1 \right) & \text{if } Y_{itk}^{(s)} = 1 \\ \delta_0 & \text{if } Z_{it}^{(s)} = 0, \end{cases}$$

where  $\delta_0$  is the dirac delta function that indicates a point mass at zero.

- For each  $s = 1, \dots, S$ , we update the vector of detection regression coefficients  $\boldsymbol{\beta}^{(s)}$  jointly. Let  $\mathbf{W}^{(s)}$  denote the row-concatenated detection design matrix for species  $s$  at all locations, times, and surveys, that is,  $\mathbf{W}^{(s)} = (\mathbf{W}_1^{(s)'}, \dots, \mathbf{W}_T^{(s)'})'$  where  $\mathbf{W}_t^{(s)} = (\mathbf{W}_{t1}^{(s)'}, \dots, \mathbf{W}_{tJ}^{(s)'})'$  is the concatenation of design matrices at all  $J$  surveys during time  $t$ . Define  $\boldsymbol{\omega}^{(s)} = (\tilde{\omega}_1^{(s)'}, \dots, \tilde{\omega}_T^{(s)'})'$  where  $\tilde{\omega}_t^{(s)} = \omega_t^{(s)} \otimes \mathbf{1}_J$  repeats the values of the random effect for each survey within the given season. For a given vector or matrix  $\Omega$ , let  $\Omega^*$  denote the sub-vector/matrix created by subsetting only the rows of  $\Omega$  for which the corresponding  $Z_{it}^{(s)} = 1$ . Then, the full conditional distribution of  $\boldsymbol{\beta}^{(s)}$  is  $[\boldsymbol{\beta}^{(s)} \mid \cdot] = N(\bar{\boldsymbol{\mu}}, \bar{\boldsymbol{\Sigma}})$ , where depending on the choice of prior distribution,

$$\bar{\boldsymbol{\Sigma}}^{-1} = \begin{cases} \left( \mathbf{W}^{(s)*'} \mathbf{W}^{(s)*} \right) & \text{if } \pi(\boldsymbol{\beta}^{(s)}) = 1 \\ \left( \mathbf{W}^{(s)*'} \mathbf{W}^{(s)*} + \tau_b \mathbf{I} \right) & \text{if } \boldsymbol{\beta}^{(s)} \sim N(0, \tau_b) \end{cases}$$

$$\bar{\boldsymbol{\mu}} = \bar{\boldsymbol{\Sigma}} \times \left\{ \mathbf{W}^{(s)*'} (\tilde{\mathbf{Y}}^{(s)*} - \boldsymbol{\omega}^{(s)*}) \right\}.$$

- Note that we define  $\omega_{it}^{(s)}$  at all combinations of  $i, t$  even if that site-season combination is not observed. Also note that the full conditional of  $\omega_{it}^{(s)}$  only depends on observations which were observed and had  $Z_{it}^{(s)} = 1$  since if the species was not actually there, then detection is undefined. Define  $\mathbf{I}_{itj}$  to be an indicator that a survey was conducted at site  $i$  during season  $t$ . Observe that the latent detection process for all site season combinations (observed and unobserved) is then a mixture distribution such that  $[\tilde{Y}_{itj}^{(s)} \mid Z_{it}^{(s)}, \omega_{it}^{(s)}, \boldsymbol{\beta}^{(s)}] = Z_{it}^{(s)} \mathbf{I}_{itj} \phi \left( \tilde{Y}_{itj}^{(s)} - \mathbf{W}_{itj}^{(s)'} \boldsymbol{\beta}^{(s)} - \omega_{it}^{(s)} \right) + (1 - Z_{it}^{(s)} \mathbf{I}_{itj}) \delta_0$ , where  $\phi(\cdot)$  is the standard normal probability density function. We will update the  $n$ -dimensional vector  $\omega_t^{(s)}$  for each  $t, s$ .

- For  $t = 1$ , observe

$$\begin{aligned} [\boldsymbol{\omega}_1^{(s)} | \cdot] &\propto \left\{ Z_{it}^{(s)} \mathbf{I}_{itj} \prod_{j=1}^{J_{it}} [\tilde{\mathbf{Y}}_{itj}^{(s)} | \cdot] + (1 - Z_{it}^{(s)}) \mathbf{I}_{itj} \delta_0 \right\} \\ &\times [\boldsymbol{\omega}_1^{(s)} | \boldsymbol{\omega}_1^{(-s)}] [\boldsymbol{\omega}_2^{(s)} | \boldsymbol{\omega}_1^{(s)}, \boldsymbol{\omega}_1^{(-s)}, \boldsymbol{\omega}_2^{(-s)}] \\ &\propto \exp \left( -\frac{1}{2} \sum_j \mathbf{Z}_1 \mathbf{I}_{1j} (\tilde{\mathbf{Y}}_{1j}^{(s)} - \mathbf{W}_{1j} \boldsymbol{\beta}^{(s)} - \boldsymbol{\omega}_1^{(s)})' (\tilde{\mathbf{Y}}_{1j}^{(s)} - \mathbf{W}_{1j} \boldsymbol{\beta}^{(s)} - \boldsymbol{\omega}_1^{(s)}) \right) \\ &\times [\boldsymbol{\omega}_1^{(s)} | \boldsymbol{\omega}_1^{(-s)}] [\boldsymbol{\omega}_2^{(s)} | \boldsymbol{\omega}_1^{(s)}, \boldsymbol{\omega}_1^{(-s)}, \boldsymbol{\omega}_2^{(-s)}] \end{aligned}$$

Note that from the conditional property of the multivariate normal distribution,  $[\boldsymbol{\omega}_1^{(s)} | \boldsymbol{\omega}_1^{(-s)}]$  is the pdf of a  $N(\boldsymbol{\omega}_1^{(-s)} \Sigma_{-s,-s}^{-1} (\Sigma_{s,s} - \Sigma_{s,-s} \Sigma_{-s,-s}^{-1} \Sigma_{-s,s}) \mathbf{I}_n)$ , and  $[\boldsymbol{\omega}_2^{(s)} | \boldsymbol{\omega}_1^{(s)}, \boldsymbol{\omega}_1^{(-s)}, \boldsymbol{\omega}_2^{(-s)}]$  is also a normal pdf with mean  $\tilde{\rho}^{(s)} \boldsymbol{\omega}_1^{(s)} + (\boldsymbol{\omega}_2^{(-s)} - (\mathbf{1}_n \otimes \tilde{\rho}^{(-s)}) \boldsymbol{\omega}_1^{(-s)}) \Sigma_{-s,-s}^{-1} \Sigma_{-s,s}$  and covariance  $(\Sigma_{s,s} - \Sigma_{s,-s} \Sigma_{-s,-s}^{-1} \Sigma_{-s,s}) \mathbf{I}_n$ . In the above, we use  $-s$  as a subscript or superscript to indicate the rows/columns that exclude  $s$ . Also,  $\Sigma$  refers to  $\Sigma_\omega$ , but the subscript is dropped here for convenience. Let  $\Sigma_{s|-s} = \Sigma_{s,s} - \Sigma_{s,-s} \Sigma_{-s,-s}^{-1} \Sigma_{-s,s}$ . Simplifying yields that when  $t = 1$ , the full conditional distribution of  $\boldsymbol{\omega}_1^{(s)}$  is  $[\boldsymbol{\omega}_1^{(s)} | \cdot] = N(\bar{\mu}, \bar{\Sigma})$ , where

$$\bar{\Sigma}^{-1} = \text{diag}(\mathbf{Z}_1 \sum_j \mathbf{I}_{1j}) + (1 + \tilde{\rho}^{(s)2}) \Sigma_{s|-s}^{-1} \mathbf{I}_n$$

and

$$\begin{aligned} \bar{\mu} = \bar{\Sigma} \left\{ \mathbf{Z}_1 \sum_j \mathbf{I}_{1j} \left( \tilde{\mathbf{Y}}_{1j}^{(s)} - \mathbf{W}_{1j} \boldsymbol{\beta}^{(s)} \right) + \Sigma_{s|-s}^{-1} (\Sigma'_{-s,s} \Sigma_{-s,-s}^{-1} \otimes \mathbf{I}_n) \boldsymbol{\omega}_1^{(-s)} \right. \\ \left. + \tilde{\rho}^{(s)} \Sigma_{s|-s}^{-1} \left[ \boldsymbol{\omega}_2^{(s)} - (\Sigma'_{-s,s} \Sigma_{-s,-s}^{-1} \otimes \mathbf{I}_n) \left( \boldsymbol{\omega}_2^{(-s)} - \tilde{\rho}^{(-s)} \boldsymbol{\omega}_1^{(-s)} \right) \right] \right\} \end{aligned}$$

- Similarly, for  $t = 2, \dots, T-1$  we get that the full conditional distribution of  $\boldsymbol{\omega}_t^{(s)}$  is  $[\boldsymbol{\omega}_t^{(s)} | \cdot] = N(\bar{\mu}, \bar{\Sigma})$ , where

$$\bar{\Sigma}^{-1} = \text{diag}(\mathbf{Z}_t \sum_j \mathbf{I}_{tj}) + (1 + \tilde{\rho}^{(s)2}) \Sigma_{s|-s}^{-1} \mathbf{I}_n$$

and

$$\begin{aligned} \bar{\mu} = \bar{\Sigma} \left\{ \mathbf{Z}_t \sum_j \mathbf{I}_{tj} \left( \tilde{\mathbf{Y}}_{tj}^{(s)} - \mathbf{W}_{tj} \boldsymbol{\beta}^{(s)} \right) \right. \\ \left. + \Sigma_{s|-s}^{-1} \left( \tilde{\rho}^{(s)} \boldsymbol{\omega}_{t-1}^{(s)} + (\Sigma'_{-s,s} \Sigma_{-s,-s}^{-1} \otimes \mathbf{I}_n) \left( \boldsymbol{\omega}_t^{(-s)} - \tilde{\rho}^{(-s)} \boldsymbol{\omega}_{t-1}^{(-s)} \right) \right) \right\} \end{aligned}$$

$$+ \tilde{\rho}^{(s)} \Sigma_{s|-s}^{-1} \left[ \boldsymbol{\omega}_{t+1}^{(s)} - (\Sigma'_{-s,s} \Sigma_{-s,-s}^{-1} \otimes \mathbf{I}_n) \left( \boldsymbol{\omega}_2^{(-s)} - \tilde{\rho}^{(-s)} \boldsymbol{\omega}_t^{(-s)} \right) \right] \Big\}$$

- For  $t = T$  the full conditional distribution of  $\boldsymbol{\omega}_T^{(s)}$  is  $[\boldsymbol{\omega}_T^{(s)} \mid \cdot] = N(\bar{\boldsymbol{\mu}}, \bar{\Sigma})$ , where

$$\bar{\Sigma}^{-1} = \text{diag}(\mathbf{Z}_T \sum_j \mathbf{I}_{Tj}) + \Sigma_{s|-s}^{-1} \mathbf{I}_n$$

and

$$\begin{aligned} \bar{\boldsymbol{\mu}} = \bar{\Sigma} \Big\{ & \mathbf{Z}_t \sum_j \mathbf{I}_{tj} \left( \tilde{\mathbf{Y}}_{tj}^{(s)} - \mathbf{W}_{tj} \boldsymbol{\beta}^{(s)} \right) \\ & + \Sigma_{s|-s}^{-1} \left( \tilde{\rho}^{(s)} \boldsymbol{\omega}_{T-1}^{(s)} + (\Sigma'_{-s,s} \Sigma_{-s,-s}^{-1} \otimes \mathbf{I}_n) \left( \boldsymbol{\omega}_T^{(-s)} - \tilde{\rho}^{(-s)} \boldsymbol{\omega}_{T-1}^{(-s)} \right) \right) \Big\} \end{aligned}$$

- Our model assumes the detection propagator matrix is of the form  $\tilde{\boldsymbol{\rho}}_i = \text{diag}(\tilde{\rho}_i^{(1)}, \dots, \tilde{\rho}_i^{(S)})$ . We update this  $S$ -dimensional vector jointly for each  $i$ . Let  $D(\boldsymbol{\omega}_{i,t-1}) = \text{diag}(\omega_{i,t-1}^{(1)}, \dots, \omega_{i,t-1}^{(S)})$  be the  $S \times S$  diagonal matrix. The full conditional distribution of the vectorized diagonal elements in  $\tilde{\boldsymbol{\rho}}_i$  is truncated multivariate normal  $[\tilde{\boldsymbol{\rho}} \mid \cdot] = N(\bar{\boldsymbol{\mu}}, \bar{\Sigma})$ , where

$$\bar{\Sigma}^{-1} = \sum_{t=2}^T D(\boldsymbol{\omega}_{i,t-1})' \Sigma_{\omega}^{-1} D(\boldsymbol{\omega}_{i,t-1})$$

$$\bar{\boldsymbol{\mu}} = \bar{\Sigma} \times \left( \sum_{t=2}^T D(\boldsymbol{\omega}_{i,t-1})' \Sigma_{\omega}^{-1} \boldsymbol{\omega}_{i,t} \right)$$

- Assume the prior for  $\Sigma_{\omega}$  is inverse Wishart with parameters  $\nu$  and  $\Psi$ . The full conditional distribution of  $\Sigma_{\omega}$  is inverse Wishart with parameters  $\nu + nT$  and  $\Psi + \sum_{t=1}^T \mathbf{B}_t$ , where  $\mathbf{B}_t$  is the  $S \times S$  matrix with  $(i, j)$ th entry  $(B_t)_{i,j} = \text{trace} \left( \mathbf{C}_{i,j}^{(t)} \right)$ , where for  $t = 1$ ,  $\mathbf{C}^{(1)}$  is the block matrix with  $(i, j)$ th block

$$\mathbf{C}_{i,j}^{(1)} = (\boldsymbol{\omega}_1^{(i)})(\boldsymbol{\omega}_1^{(j)})'$$

for  $i, j = 1, \dots, S$ , and for  $t = 2, \dots, T$  we have the block matrix with  $(i, j)$ th block

$$\mathbf{C}_{i,j}^{(t)} = (\boldsymbol{\omega}_t^{(i)} - \tilde{\boldsymbol{\rho}}^{(i)} \boldsymbol{\omega}_{t-1}^{(i)})(\boldsymbol{\omega}_t^{(j)} - \tilde{\boldsymbol{\rho}}^{(j)} \boldsymbol{\omega}_{t-1}^{(j)})',$$

where  $\boldsymbol{\omega}_t^{(i)} = (\omega_{1t}^{(i)}, \dots, \omega_{nt}^{(i)})$  and  $\tilde{\boldsymbol{\rho}}^{(i)} = (\tilde{\rho}_1^{(i)}, \dots, \tilde{\rho}_n^{(i)})$ .

## References

Hepler, S.A. and R.J. Erhardt. 2021. A spatiotemporal model for multivariate occupancy data. *Environmetrics* 32(2): e2657 .
